# Supplementary material
Source: PubMed Central journal article supplement (PMC2785589)
Supplement: supp_M109.043604_jbc.M109.043604-1.pdf [file supp_M109.043604_jbc.M109.043604-1.pdf]

## SUPPLEMENTARY FIGURE LEGENDS

**FIGURE S1. Effect of DGK $\eta$  siRNA on ERK1/2 phosphorylation.** *A* and *B*, HeLa cells were transfected with control siRNA or DGK $\eta$  siRNA #1 (*A*), #2 (*A*) or #3 (*B*). After 72 h, the cells were serum-starved for 5 h and stimulated with 100 ng/ml of EGF for 5 min. Phospho-ERK1/2, ERK1/2, DGK $\eta$ , and actin were detected using their specific antibodies by Western blot (WB). *C*, HEK293 cells were transfected with control siRNA or DGK $\eta$  siRNA #1. After 72 h, the cells were serum-starved for 5 h and stimulated with 100 ng/ml of EGF for 2 min. Phospho-ERK1/2, ERK1/2, DGK $\eta$ , and  $\beta$ -actin were detected using their specific antibodies by Western blot (WB).

**FIGURE S2. Silencing of DGK $\delta$  expression does not affect activation of MEK1/2 by RasV12.** HeLa cells were transfected with control siRNA or DGK $\delta$  siRNA. After 24 h, the cells were transfected with pcDNA3.1 or pCMV-H-RasV12. After 48 h of transfection with the expression plasmids, the cells were serum-starved for 5 h. Phospho-MEK1/2, MEK1/2, DGK $\delta$ , Ras and  $\beta$ -actin in the cell lysates were detected by Western blot (WB). The bands marked by asterisk represent non-specific bands reacting with anti-DGK $\delta$  antibody.

**FIGURE S3. Effect of DGK $\eta$  siRNA on C-Raf binding to Ras.** HeLa cells were transfected with control siRNA or DGK $\eta$  siRNA #1. After 24 h, the cells were transiently transfected with pCMV-H-RasV12 or pCMV-H-RasN17. After 24 h of transfection with the expression plasmids, the cells were serum-starved for 5 h. Endogenous C-Raf in the cell lysates was immunoprecipitated with anti-C-Raf antibody. RasV12 or RasN17 binding to C-Raf was detected using anti-Ras antibody by Western blot (WB). TCL, total cell lysates; IP, immunoprecipitate.

**FIGURE S4. DGK $\eta$  exhibits no effect on S338 phosphorylation of C-Raf, and modulates MEK1/2 activation by a constitutively active mutant of C-Raf.** The HeLa cells were transfected with control siRNA or DGK $\eta$  siRNA #1. *A*, after 72 h, the cells were serum-starved for 5 h and stimulated with 100 ng/ml of EGF for the indicated times. Ser338 phosphorylation of C-Raf was analyzed using Western blot (WB). Upper panels: representative results of Western blot analysis are shown. Bottom panel: the phospho-C-Raf levels are shown as means  $\pm$  SD of three independent experiments. *B*, after 24 h of transfection with the siRNAs, cells were transfected with pcDNA3.1 (–) or pCMV-C-Raf-DEED, where Ser338/Tyr341/Thr491/Ser494 were replaced with Asp/Asp/Glu/Asp, respectively (C-Raf-DEED). After 24 h of transfection with the expression plasmids, the cells were serum-starved for 5 h. The cells transfected with pcDNA3.1 were stimulated with 100 ng/ml of EGF as controls (EGF) for 2 min. Phospho-MEK1/2, MEK1/2, and C-Raf were detected by Western blot analysis using their specific antibodies. Upper panels: representative results of Western blot analysis are shown. Bottom panel: phospho-MEK1/2 levels were quantified by densitometry. Phospho-MEK1/2 levels in the cells, which were transfected with control siRNA and pcDNA3.1 and stimulated with EGF for 2 min, were set to 100. The data are shown as means  $\pm$  SD of three independent experiments.

**FIGURE S5. DGK $\eta$  regulates B-Raf/C-Raf heterodimerization independently or downstream of 14-3-3 proteins.** The HeLa cells were transfected with control siRNA or DGK $\eta$  siRNA #1. After 72 h, the cells were serum-starved for 5 h and stimulated with 100 ng/ml of EGF for 2 min. Endogenous C-Raf in the cell lysates was immunoprecipitated with anti-C-Raf antibody. 14-3-3 proteins associated with C-Raf were detected using Western blot (WB). Normal rabbit IgG was used as a negative control. TCL, total cell lysates; IP, immunoprecipitate.

**FIGURE S6. Effect of U0126 on C-Raf kinase activities in cells transfected with DGK $\eta$ -siRNA.** The HeLa cells were transfected with control siRNA or DGK $\eta$  siRNA #1. After 72 h, the cells were

serum-starved for 5 h and incubated with DMSO (–) or 10  $\mu$ M of U0126 for 30 min. EGF stimulation was performed at a concentration of 100 ng/ml of EGF for 2 min. Endogenous C-Raf in the cell lysates was immunoprecipitated with anti-C-Raf antibody. C-Raf kinase activities of the immunoprecipitants were measured *in vitro* as described in Figure 5. TCL, total cell lysates; WB, Western blot.

**FIGURE S7. DGK $\eta$  is required for heterodimerization of B-Raf with C-Raf induced by RasV12 expression.** The HeLa cells were transfected with control or DGK $\eta$  siRNA. After 24 h, cells were transiently transfected with pcDNA3.1 or pCMV-H-RasV12. After 24 h of transfection with the expression plasmids, the cells were serum-starved for 5 h. Endogenous C-Raf in the cell lysates was immunoprecipitated with anti-C-Raf antibody. B-Raf associated with C-Raf was detected using Western blot (WB). TCL, total cell lysates; IP, immunoprecipitate.

**A**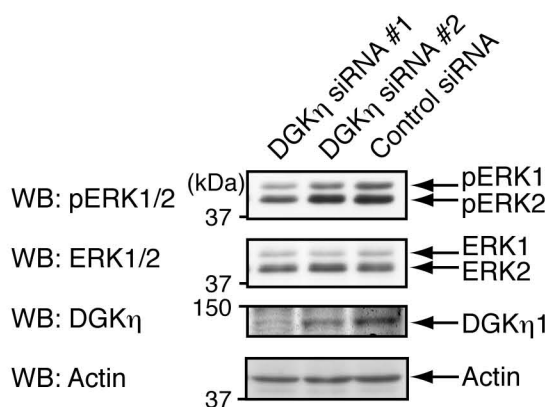**B**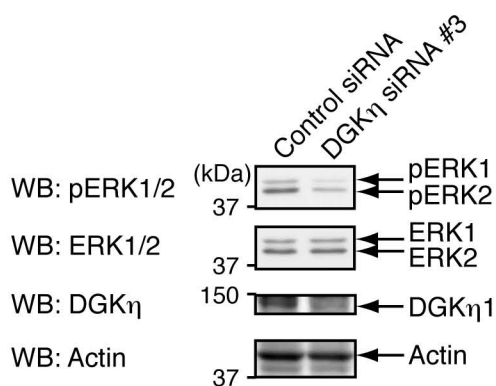**C**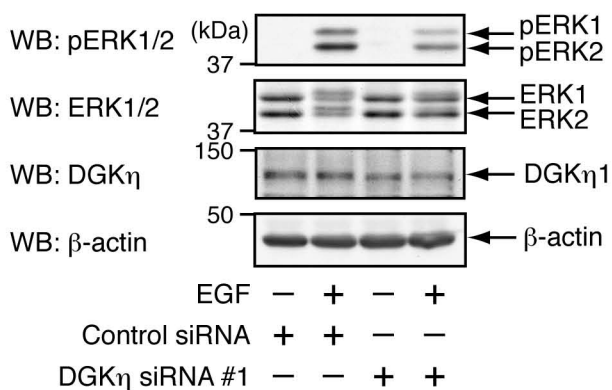**Figure S1**

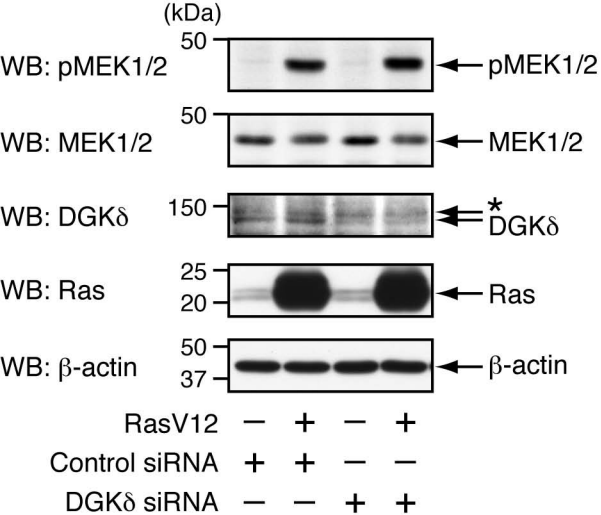

**Figure S2**

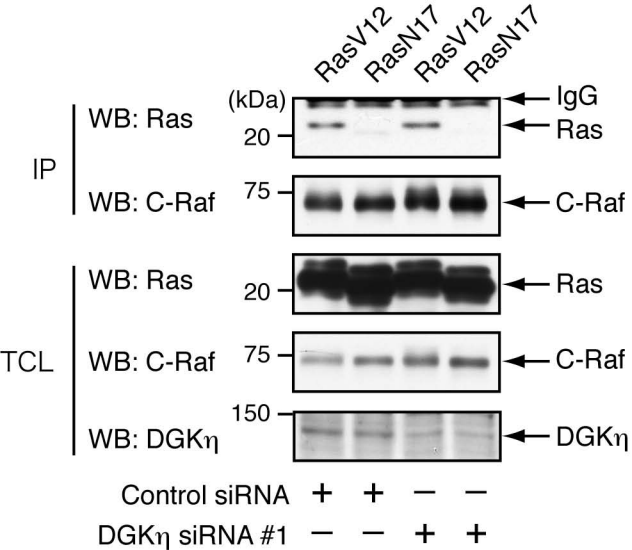

**Figure S3**

**A**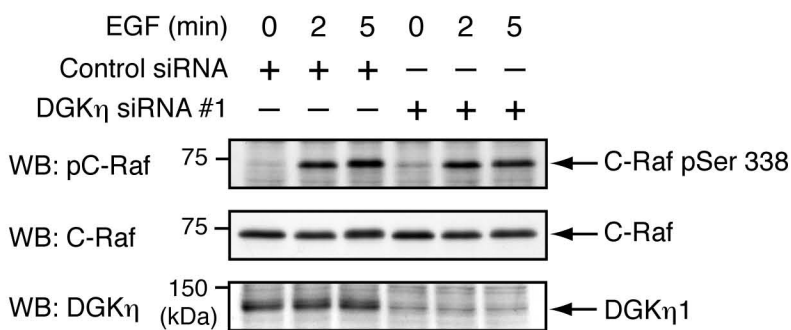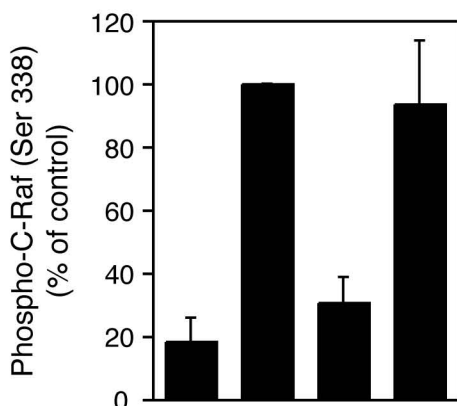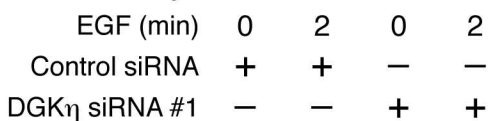**B**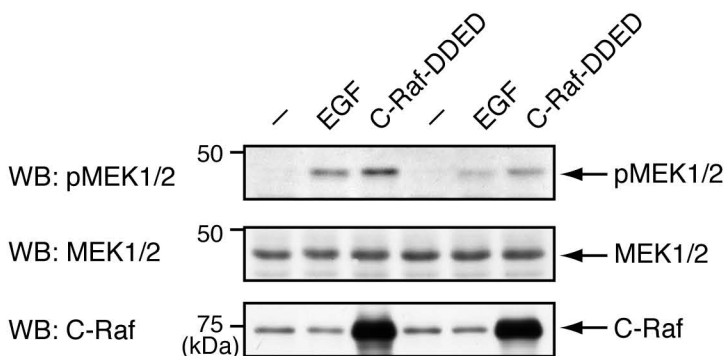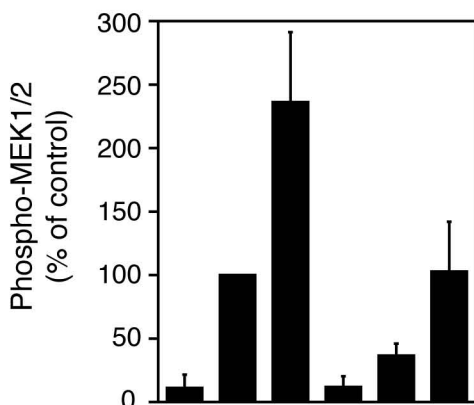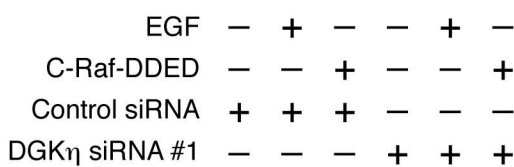**Figure S4**

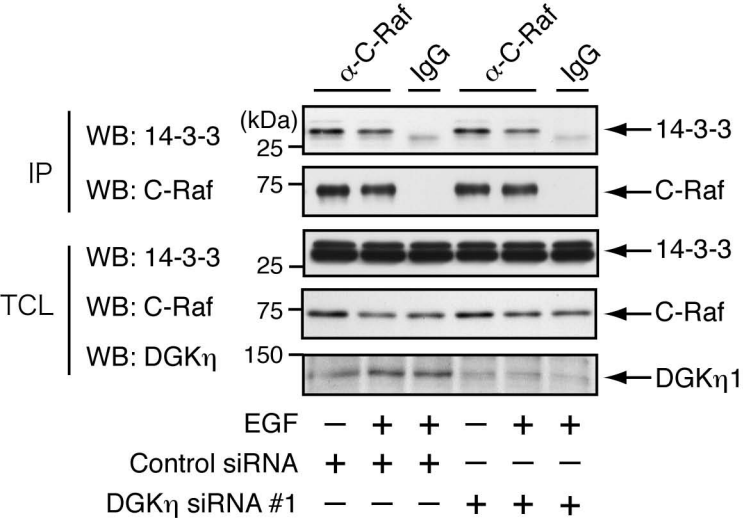

**Figure S5**

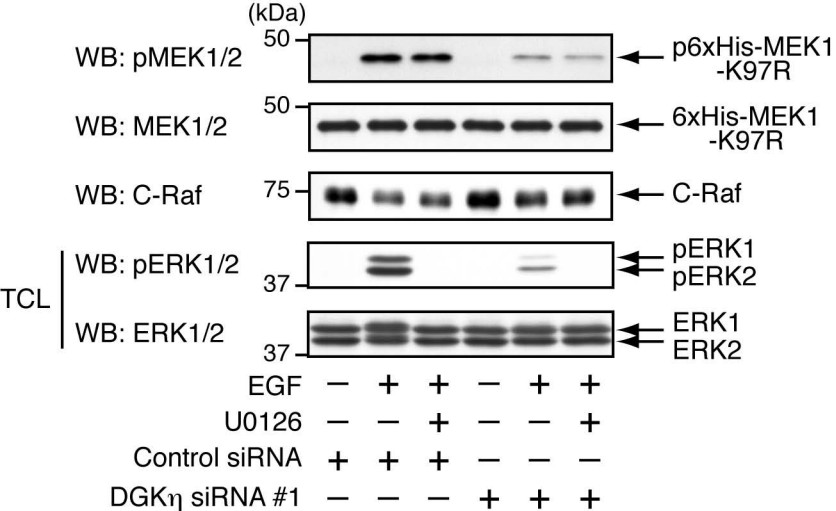

**Figure S6**



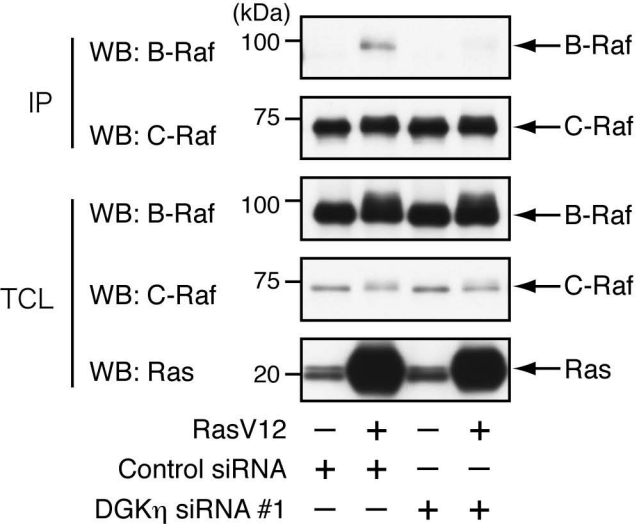

**Figure S7**
